# Supplementary material for: Biostimulants Improve Plant Growth and Bioactive Compounds of Young Olive Trees under Abiotic Stress Conditions
Source: MDPI journal article supplement (doi:10.3390/agriculture12020227), 2022-02-04
Supplement: s1 [file s1]

RT: 0.00 - 35.00 SM: 7G

NL:  
4.51E9  
TIC F: FTMS - p  
ESI Full ms  
[100.0000-  
1200.0000] MS

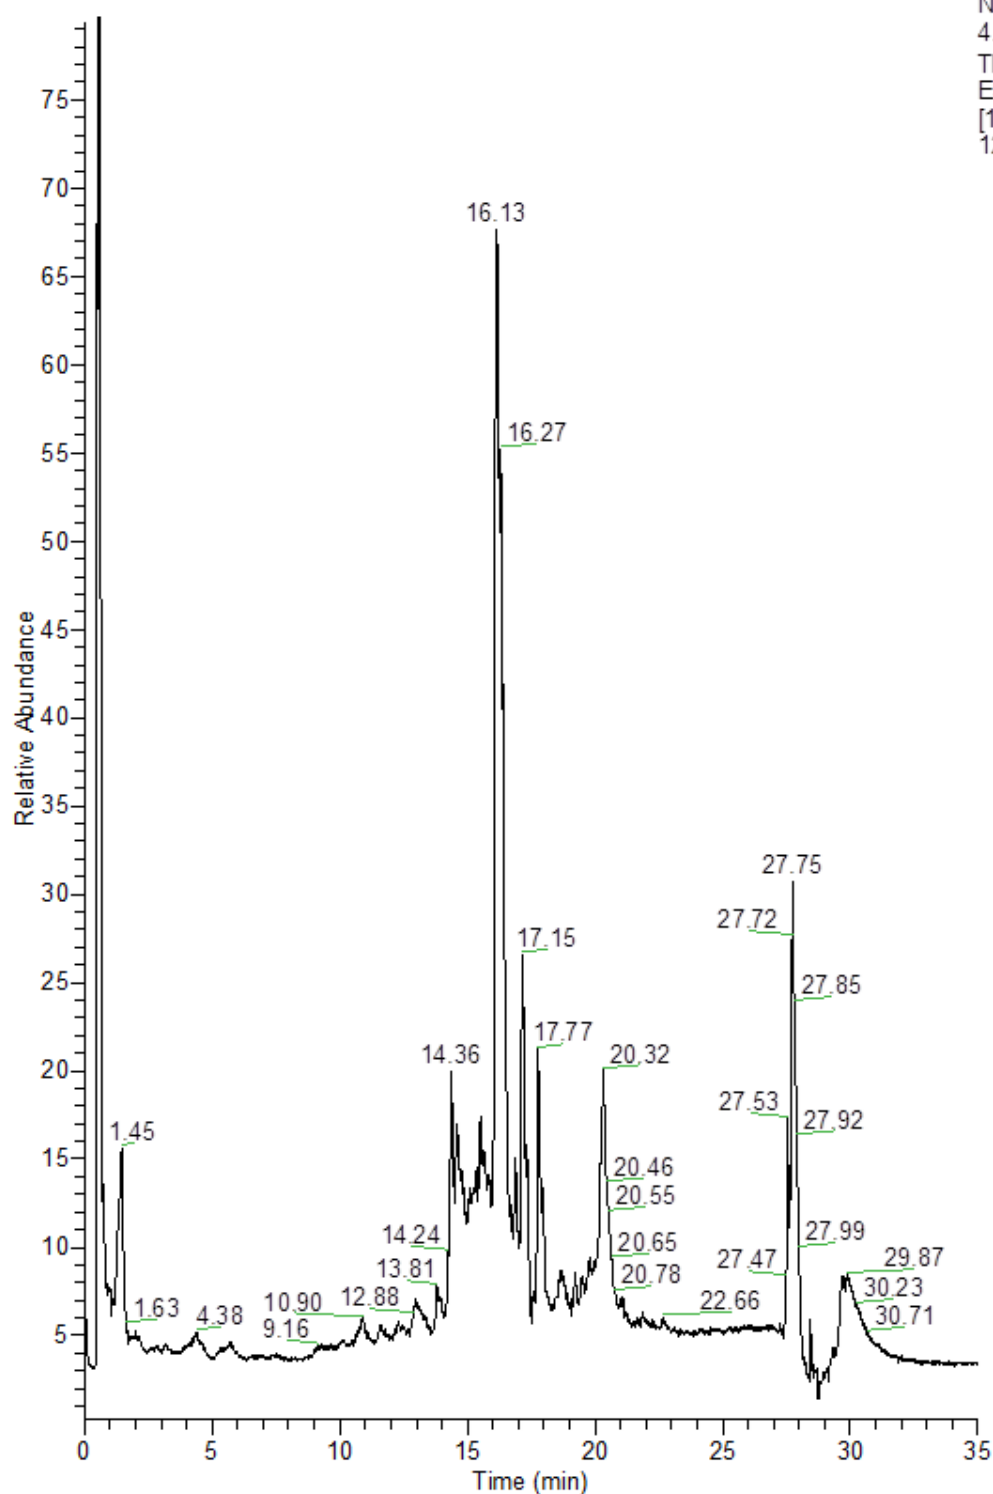

**Figure S1:** Typical chromatograms observed for the extracts of olive leaves analyzed in this study and the mass specifications of the compounds of interest relative to phenolic compounds (separation via UHPLC).

**Table S1:** Retention time and exact mass spectra data of apple polyphenols investigated by UHPLC-HRMS Orbitrap

| Compound             | Formula   | Theoretical mass   | Experimental mass | Error |
|----------------------|-----------|--------------------|-------------------|-------|
|                      |           | [M-H] <sup>-</sup> |                   | Δ ppm |
| ligstroside          | C25H32O12 | 523.18210          | 523.18079         | -2.50 |
| oleuropein aglycone  | C19H22O8  | 377.12419          | 377.12442         | 0.61  |
| verbascoside         | C29H36O15 | 623.19814          | 623.19952         | 2.21  |
| oleuropein           | C25H32O13 | 539.17701          | 539.17792         | 1.69  |
| OH-tyrosol-glucoside | C13H18O8  | 301.09289          | 301.09329         | -1.85 |
| pinoresinol          | C20H22O6  | 357.13436          | 357.1337          | -1.85 |
| vanillic acid        | C8H8O4    | 167.03498          | 167.03426         | -4.31 |
| ferulic acid         | C10H10O4  | 193.05063          | 193.04971         | -4.77 |
| coumaric acid        | C9H8O3    | 163.03917          | 163.03931         | 0.86  |
| luteolin rutinoside  | C27H30O15 | 593.15119          | 593.15222         | 1.74  |
| secologanoside       | C16H22O11 | 389.10893          | 389.10837         | -1.44 |
| luteolin             | C15H10O6  | 285.04062          | 285.04083         | 0.74  |
